1 **Genetic structure of the stingless bee *Tetragonisca angustula***

2 FLÁVIO O. FRANCISCO,<sup>1,2</sup> LEANDRO R. SANTIAGO,<sup>1</sup> YURI M. MIZUSAWA,<sup>1</sup>

3 BENJAMIN P. OLDROYD<sup>2</sup> and MARIA C. ARIAS<sup>1</sup>

4

5 <sup>1</sup>*Departamento de Genética e Biologia Evolutiva, Instituto de Biociências, Universidade de*  
6 *São Paulo, Rua do Matão 277 – sala 320, São Paulo, SP 05508-090, Brazil*

7 <sup>2</sup>*Behaviour and Genetics of Social Insects Lab, School of Biological Sciences A12, University*  
8 *of Sydney, Sydney, NSW 2006, Australia*

9

10

11 Correspondence:

12 Flávio O. Francisco, Departamento de Genética e Biologia Evolutiva, Instituto de Biociências,  
13 Universidade de São Paulo, Rua do Matão 277 – sala 320, 05508-090, São Paulo, SP, Brazil

14 E-mail: [fofrancisco@usp.br](mailto:fofrancisco@usp.br)

15

16 Running title: Genetic structure of *T. angustula*

17

18 **Abstract**

19 The stingless bee *Tetragonisca angustula* Latreille 1811 is one of the most widespread bee  
20 species in the Neotropics, distributed from Mexico to Argentina. However, this wide  
21 distribution contrasts with the low distance that females travel to build new nests whereas  
22 nothing is known about male dispersion. Previous studies of *T. angustula* were ambiguous  
23 concerning its genetic structure and were based only on nuclear markers and on small and/or  
24 limited sample size. Here we evaluate the genetic structure of several populations of *T.*  
25 *angustula* by using mitochondrial DNA and microsatellites. These markers can help us to  
26 detect differences in the migratory behavior between males and females. Our results showed  
27 that the populations were highly differentiated suggesting that both females and males are low  
28 dispersers. Therefore, its continental distribution might consist of several different taxa.

29

30 **Key words.** islands, Meliponini, microsatellites, mtDNA, population genetics

## 31 **Introduction**

32 The stingless bee *Tetragonisca angustula* Latreille 1811 is one of the most widespread bee  
33 species in the Neotropics, distributed from Mexico to Argentina (Silveira *et al.* 2002;  
34 Camargo & Pedro 2013). It is a small (4-5 mm in length), generalist and highly eusocial bee  
35 (Michener 2007) and highly adaptable to different nest sites. Colonies comprise up to 5,000  
36 individuals (Lindauer & Kerr 1960), and are usually built in tree trunks or in wall cavities. It  
37 presents high rates of swarming and it is extremely successful in surviving in urban  
38 environments (Batista *et al.* 2003; Slaa 2006; Velez-Ruiz *et al.* 2013). In addition, *T.*  
39 *angustula* is one of the most cultivated stingless bees in Latin America (Nogueira-Neto 1997;  
40 Cortopassi-Laurino *et al.* 2006) and nest transportation and trading is very common among  
41 beekeepers.

42 In general, colony reproduction in stingless bees begins by workers searching for a  
43 new nest site within their foraging range (van Veen & Sommeijer 2000a). The daughter nests  
44 are established at most a few hundred meters from the “mother” nest (Nogueira-Neto 1997).  
45 After selecting the site, several workers begin to transport cerumen, propolis and honey from  
46 the “mother” nest to the new one (Nogueira-Neto 1997). This transport can last from few days  
47 (van Veen & Sommeijer 2000a) to few months (Nogueira-Neto 1997). The virgin queen  
48 leaves the “mother” nest accompanied by hundreds of workers (van Veen & Sommeijer  
49 2000b). The next day the virgin queen flies out, mates with presumably one male (Peters *et al.*  
50 1999; Palmer *et al.* 2002), returns to the nest and about a week later begins oviposition (van  
51 Veen & Sommeijer 2000b).

52 In contrast, little is known about stingless bee males reproductive behavior. After  
53 birth, they remain in the nest for two to three weeks (Cortopassi-Laurino 2007). They then  
54 leave the nest and never return. There are no data about the behavior of males during their  
55 period outside the nest. In laboratory, males can live up to six weeks (Velthuis *et al.* 2005).

56 Therefore, they likely have two to four weeks for dispersal and reproduction. It has been  
57 shown that reproductive aggregations are composed of males from hundreds of different, and  
58 not necessarily from nearby colonies, suggesting high male dispersal (Paxton 2000; Cameron  
59 *et al.* 2004; Kraus *et al.* 2008; Mueller *et al.* 2012).

60 Studies on the genetic structure of populations can help us better understand dispersal  
61 behavior and evolutionary history. Few population genetic studies focusing *T. angustula* have  
62 been conducted using molecular markers. Nonetheless the conclusions were ambiguous  
63 concerning gene flow and populations differentiation (Oliveira *et al.* 2004; Baitala *et al.* 2006;  
64 Stuchi *et al.* 2008). In addition, these studies have analyzed only nuclear markers (RAPD and  
65 isozymes) on limited sample size or distribution. This makes difficult to detect differences in  
66 the migratory behavior between males and females and to make general inferences about their  
67 evolutionary history.

68 Here our aim is to evaluate the genetic structure of several populations of *T. angustula*  
69 by using mitochondrial DNA (mtDNA) and microsatellites. Considering the high distribution  
70 of *T. angustula* and the commonness of nest transportation and trading, we expect low genetic  
71 differentiation among populations despite the low female dispersal capability.

72

73

## 74 **Materials and methods**

### 75 *Sampling*

76 We collected 1,002 *T. angustula* from 457 sites distributed in mainland and on islands in  
77 south/south-eastern Brazil (Table S1). Eleven islands all with arboreal vegetation and of area  
78 greater than 1.0 km<sup>2</sup> were selected, 10 being land-bridge islands isolated about 12,000 years  
79 ago (Suguio *et al.* 2005) and one sedimentary island (Ilha Comprida) which arose about 5,000  
80 years ago (Suguio *et al.* 2003). The islands range in size from 1.1 to 451 km<sup>2</sup> and are 0.1 to 38

81 km from the mainland (Table S2, Fig. 1). Bees were sampled from nests ( $n = 125$ , one per  
82 nest) and flowers ( $n = 877$ ) (Table S1). At the end, samples were grouped into 17 populations,  
83 being 14 on the mainland and three on islands (Figure 1).

84 We preserved the specimens in 96% ethanol for transport to the laboratory. DNA  
85 extraction followed the protocol described in Francisco *et al.* (2014). We dried the specimens  
86 at room temperature for 20 min prior to DNA extraction.

87

#### 88 *Mitochondrial DNA sequencing*

89 Two mitochondrial genes were partially sequenced: cytochrome c oxidase subunit 1 (*COI*)  
90 and cytochrome b (*Cytb*). Details about amplification and sequencing are given in Francisco  
91 *et al.* (2014).

92

#### 93 *Microsatellite genotyping*

94 The samples were genotyped for eleven microsatellite loci: Tang03, Tang11, Tang12,  
95 Tang17, Tang29, Tang57, Tang60, Tang65, Tang68, Tang70, and Tang77 (Brito *et al.* 2009).  
96 PCR conditions for each locus are given in Francisco *et al.* (2014). Electrophoresis,  
97 visualization and genotyping were performed according to Francisco *et al.* (2011).

98 MICRO-CHECKER 2.2.3 (van Oosterhout *et al.* 2004) was used to identify null alleles  
99 and scoring errors. COLONY 2.0.1.7 (Jones & Wang 2010) was used to determine whether  
100 individuals collected in the same plant or places nearby were related. Samples were excluded  
101 from our data set if matched the following three criteria: collected at sites distant less than 2  
102 km, indicated as related by COLONY, and sharing a mtDNA haplotype. Overall, 722 *T.*  
103 *angustula* bees from 17 populations were deemed suitable for further genetic analyses (Table  
104 1).

105           GENEPOP 4.1.2 (Rousset 2008) was used to verify Hardy-Weinberg equilibrium  
106 (HWE) in populations and loci and to detect linkage disequilibrium (LD). Markov chain was  
107 set for 10000 dememorizations, 1000 batches and 10000 iterations per batch. In cases of  
108 multiple comparisons  $P$ -values were corrected by applying Sequential Goodness of Fit test by  
109 the program SGOF 7.2 (Carvajal-Rodríguez *et al.* 2009). This method is advantageous over  
110 other correction methods because it increases its statistical power with the increasing of the  
111 number of tests (Carvajal-Rodríguez *et al.* 2009).

112

### 113 *Genetic diversity*

114 ARLEQUIN 3.5.1.3 (Excoffier & Lischer 2010) was used to calculate mtDNA haplotype ( $h$ )  
115 and nucleotide ( $\pi$ ) diversity. GENALEX 6.5 (Peakall & Smouse 2006, 2012) was used to  
116 calculate microsatellite allelic richness ( $A$ ) and expected heterozygosity ( $H_E$ ). Since sample  
117 sizes were different, allelic richness was standardized by rarefaction ( $A_r$ ) using the program  
118 HP-RARE 1.0 (Kalinowski 2005). Differences in  $A_r$  among populations were estimated by  
119 Mann-Whitney two-tailed U Test (Mann & Whitney 1947). Inbreeding coefficients ( $F_{IS}$ ) were  
120 calculated for each population with 10000 permutations using ARLEQUIN.

121

### 122 *Population differentiation and gene flow*

123 MEGA 5.2.1 (Tamura *et al.* 2011) was used to calculate mtDNA's number of base  
124 substitutions per site from averaging over all sequence pairs between populations using the  
125 Kimura 2-parameter (K2p) model (Kimura 1980). Population pairwise  $\theta$  values (an  $F_{ST}$   
126 analogue, Weir & Cockerham 1984) were calculated with 10000 permutations by ARLEQUIN  
127 using microsatellite alleles. When heterozygosity is high,  $F_{ST}$  and its analogues may not be  
128 appropriate measures of genetic differentiation (Hedrick 2005; Jost 2008; Heller &  
129 Siegismund 2009). For this reason, Jost's  $D_{est}$  (Jost 2008) was calculated. This statistic is not

130 influenced by heterozygosity (Jost 2008) and is more appropriate for microsatellite data  
131 (Heller & Siegismund 2009). Global  $D_{est}$  was calculated with 9999 permutations for mtDNA  
132 and microsatellite data using GENALEX. Pairwise  $D_{est}$  was calculated only for microsatellite  
133 data. Mantel tests between genetic and geographical distances among populations were  
134 performed with 9999 permutations by GENALEX to verify isolation by distance for both  
135 molecular markers.

136 BAPS 6 (Corander *et al.* 2008; Cheng *et al.* 2013) was used to infer population  
137 structure using microsatellites and the geographic coordinates of the sampled individuals to  
138 spatially cluster them. It is a Bayesian analysis of genetic population structure that creates  $K$   
139 groups of individuals based on the similarity of their genotypes. The program was initially ran  
140 5 times for each of  $K = 1$  to 17 and then 10 times for each of  $K = 5$  to 14. These results were  
141 used for admixture analysis with 200 iterations to estimate the admixture coefficients for the  
142 individuals, 200 simulated reference individuals per population and 20 iterations to estimate  
143 the admixture coefficients of the reference individuals.

144 Estimates of rates and direction of current and/or recent migration ( $m$ ) between  
145 populations were determined by the program BAYESASS 3 (Wilson & Rannala 2003) using  
146 microsatellites multilocus genotypes through Markov chain Monte Carlo (MCMC)  
147 techniques. We performed five independent runs with  $10^7$  MCMC iterations, burn-in of  $10^6$   
148 iterations and sampling frequency of 2000. The delta values used were 0.25 (migration), 0.40  
149 (allele frequencies) and 0.55 (inbreeding).

150

#### 151 *Assessment of population demography*

152 To detect the occurrence of a recent bottleneck event we used microsatellite data to verify the  
153 occurrence of excess of heterozygosity in the populations using the program BOTTLENECK  
154 1.2.02 (Piry *et al.* 1999). We used the two-phased model (TPM) of mutation which is

155 suggested as the most appropriate for microsatellites (Di Rienzo *et al.* 1994). The variance  
156 among multiple steps was 12 and the proportion of stepwise mutation model in the TPM was  
157 95% as suggested by Piry *et al.* (1999). Altogether 10000 iterations were performed. The  
158 significance of such deviation was determined with a Wilcoxon sign-rank test. In addition, our  
159 second approach was to verify if allelic frequencies presented a mode shift away from an L-  
160 shaped distribution (Luikart *et al.* 1998) also using BOTTLENECK.

161

162

## 163 **Results**

### 164 *Island occurrences*

165 *Tetragonisca angustula* was found and collected on five of the 11 islands visited (Table 1).

166 However, only the samples from Ilha Grande, Ilha de São Sebastião and Ilha Comprida were  
167 included in the analyses. The other collections were not included due to small sample size  
168 (Ilha do Cardoso,  $n = 1$ ), and to individuals being highly related with anecdotal reports of  
169 introduced nests (Ilha de Santa Catarina, see Francisco *et al.* (2014)).

170

### 171 *MtDNA diversity*

172 The *COI* gene sequences were 417 bp long (GenBank accession numbers KF222891-  
173 KF223893) and 32 haplotypes were identified. The *Cytb* sequences were 391 bp long  
174 (KF223894-KF224896) and generated 43 haplotypes. Most differences among haplotypes  
175 were synonymous substitutions, since the number of unique amino acid sequences were four  
176 for *COI* and 15 for *Cytb*. We concatenated the nucleotide sequences (808 bp) for population  
177 analyses.

178 The 722 concatenated sequences defined 73 haplotypes. Since  $h$  and  $\pi$  were positively  
179 correlated ( $r = 0.510$ ,  $P = 0.036$ ,  $n = 17$ ) we hereafter use  $\pi$  as our measure of mtDNA



180 diversity. Nucleotide diversity ranged from  $0.0006 \pm 0.0019$  (Passa Quatro) to  $0.0407 \pm$   
181  $0.0251$  (Ilha Comprida) (Table 1).

182 There was a non-significant positive correlation between the size of the sampled area  
183 and mtDNA diversity ( $r = 0.135$ ,  $P = 0.606$ ,  $n = 17$ ). The correlation between median  
184 elevation and mtDNA diversity was negative but non-significant ( $r = -0.428$ ,  $P = 0.087$ ,  $n =$   
185  $17$ ).

186

### 187 *MtDNA differentiation*

188 Population structure was high. Sixty-seven haplotypes out of the 73 were population-specific.  
189 We built a haplotype network where the frequency and distribution of haplotypes are shown  
190 (Figure S1). It is worth noting the ‘star-pattern’ centered on four haplotypes, the high number  
191 of exclusive haplotypes and the great number of nucleotide substitutions separating Porto  
192 União/Foz do Iguaçu from the others. The populations Teresópolis, Resende, Prudentópolis,  
193 Angra dos Reis, and Ilha Grande all had unique haplotypes.

194 Global  $D_{est}$  was  $0.772$  ( $P < 0.001$ ) indicating a highly significant population structure.  
195 The highest K2p values were found for Porto União/Foz do Iguaçu with respect to all other  
196 populations (2.809% to 3.306%) (Table 2).

197

### 198 *Microsatellite diversity*

199 After the Sequential Goodness of Fit correction, deviation from HWE was occasional, likely  
200 arising from type 1 error, and therefore no locus was removed from the analyses (Table S3).  
201 No significant LD was found between any pair of loci (all  $P > 0.05$ ).

202 Microsatellite diversity was moderate to high.  $A_r$  and  $H_E$  were positively correlated ( $r$   
203  $= 0.787$ ,  $P < 0.001$ ,  $n = 17$ ). Hereafter we use  $A_r$  as our measure of microsatellite diversity.  $A_r$   
204 was standardized for 22 individuals and ranged from 5.37 (Porto União) to 9.45 (Resende)

205 (Table 1).  $A_r$  was significantly different only between Porto União and Resende ( $U = 93$ ,  $P =$   
206  $0.033$ ) and Porto União and Teresópolis ( $U = 29$ ,  $P = 0.039$ ).

207 There was a negative but non-significant correlation between  $A_r$  and size of the  
208 sampled area ( $r = -0.114$ ,  $P = 0.662$ ,  $n = 17$ ) and between  $A_r$  and median elevation ( $r = -$   
209  $0.084$ ,  $P = 0.748$ ,  $n = 17$ ).

210 Six populations had inbreeding coefficients ( $F_{IS}$ ) significantly different from zero ( $P <$   
211  $0.05$ ). The highest  $F_{IS}$  ( $0.2177$ ) was found in São José (Table 1).

212

### 213 *Microsatellite differentiation*

214 Global  $D_{est}$  was high ( $0.375$ ,  $P < 0.001$ ) and indicates population structure. Pairwise  
215 comparisons also detected population structure, since most  $\theta$  values were between  $0.05$  and  
216  $0.15$  (Table S4) and most  $D_{est}$  values were higher than  $0.25$  (Table 3). Pairwise  $\theta$  and  $D_{est}$   
217 were positively correlated ( $r = 0.977$ ,  $P < 0.001$ ,  $n = 136$ ) and we use  $D_{est}$  as our measure of  
218 microsatellite differentiation hereafter.  $D_{est}$  ranged from  $0.0204$  (Guaratuba  $\times$  Blumenau) to  
219  $0.8464$  (Prudentópolis  $\times$  Foz do Iguaçu).  $D_{est}$  high values were always detected in  
220 comparisons encompassing Porto União/Foz do Iguaçu and others. Low differentiation was  
221 observed in some populations near the coast (Iguape, Apiaí, Guaratuba, Blumenau, and São  
222 José) but also inland (Porto União  $\times$  Foz do Iguaçu and Prudentópolis  $\times$  Teodoro Sampaio).

223 Population structure was also suggested by the spatial cluster approach used by BAPS,  
224 which determined  $K = 10$  as the most likely optimal number of clusters (probability of  
225  $98.99\%$ ). The clusters were [Foz do Iguaçu/Porto União], [Iguape/Apiaí/Guaratuba/  
226 Blumenau/SãoJosé], [Ilha Comprida], [São Sebastião], [Ilhabela], [Ilha Grande], [Passa  
227 Quatro], [Teodoro Sampaio/Prudentópolis], [Teresópolis], [Resende/Angra dos Reis] (Figure  
228 1).  $D_{est}$  results are in good agreement with these clusters.

229           The results of the migration rates estimated in BAYESASS suggested a low level of gene  
230 flow throughout the studied area (Table S5). Only 15 out of 272 comparisons presented  $m > 0$   
231 between two populations. Most of the populations that presented gene flow are near the coast  
232 (Figure 1), but populations inland such as Porto União × Foz do Iguaçu also showed evidence  
233 of gene flow. Migration asymmetry was also detected. For instance, the non-differentiation  
234 detected previously between Prudentópolis × Teodoro Sampaio is due to high migration rate  
235 (0.2486) from Prudentópolis to Teodoro Sampaio, since the opposite was not detected (Table  
236 S5). The results obtained by BAYESASS are in good agreement with the population structure  
237 indicated by  $\theta$ ,  $D_{\text{est}}$  and BAPS.

238

#### 239 *Isolation by distance*

240 There was a positive and significant correlation between geographic and genetic distance for  
241 both mitochondrial ( $r = 0.415$ ,  $P = 0.004$ ,  $n = 136$ ) and microsatellite markers ( $r = 0.464$ ,  $P <$   
242  $0.001$ ,  $n = 136$ ).

243

#### 244 *Population demography*

245 The Wilcoxon sign test did not reveal recent bottleneck in any of the 17 populations (all  $P >$   
246  $0.1392$ , Table S6). The model-shift test showed that the allele frequency distribution in all  
247 populations show the expected L-shaped curve that is expected in the absence of recent  
248 bottlenecks.

249 **Discussion**

250 Our results showed high structure in *T. angustula* populations. Populations were highly  
251 differentiated as demonstrated by mtDNA and microsatellite markers, suggesting that both  
252 females and males are low dispersers.

253 The mtDNA nucleotide diversity ( $\pi$ ) ranged from low to high. High  $\pi$  suggests a long  
254 evolutionary history for the populations. Low  $\pi$  may be explained by lineage sorting or be an  
255 evidence of population bottleneck in the past. Several studies of population genetics and  
256 phylogeography of vertebrates and invertebrates, conducted in the same area we studied, have  
257 also found low mtDNA nucleotide diversity (Cabanne *et al.* 2007; Carnaval *et al.* 2009;  
258 Batalha-Filho *et al.* 2010; Brito & Arias 2010; Francisco & Arias 2010; D'Horta *et al.* 2011;  
259 Bell *et al.* 2012). As argued in these studies, during Pleistocene this geographic area seems to  
260 have witnessed ancient bottlenecks followed by species expansion.

261 For *T. angustula* a strong evidence of this phenomenon came from the haplotype  
262 network in star shape, centered in some haplotypes. According to Avise (2000) this shape is  
263 an indicative of bottleneck followed by population expansion. Therefore, it is likely that  
264 populations that present high mtDNA diversity (e.g. Angra dos Reis) remained in putative  
265 stable areas while populations with low mtDNA diversity (e.g. Passa Quatro) are in regions  
266 that likely used to be outside the refuges and may be result of the expansion of stable  
267 populations.

268 We found overall high mitochondrial genetic differentiation among populations. In  
269 despite of the species present wide distribution its populations are not homogenous. Similar  
270 population structure has been observed for other stingless bee species (Brito & Arias 2010;  
271 Francisco & Arias 2010; Quezada-Euán *et al.* 2012; Brito *et al.* 2013; Francisco *et al.* 2013).  
272 The mtDNA population structure seems to be reflecting the reproductive behavior of *T.*  
273 *angustula*. However, we verified that some populations are not differentiated from others.

274 This is likely due to gene flow but we cannot rule out the human role in mediating nests  
275 introduction in different areas. For instance, haplotypes 34, 35, and 36 all found in Ilha  
276 Comprida, were similar to those found in Passa Quatro/Teodoro Sampaio (34 and 36) and  
277 Teresópolis (35) (Figure S1). Due to the high rate of exclusive haplotypes and the distance  
278 among these populations, we believe these nests were transported to Ilha Comprida and  
279 caused an artificial increase in this population's mtDNA diversity.

280 Nuclear genetic diversity was moderate to high in all populations. The difference  
281 between genetic diversity obtained from mtDNA and microsatellites may indicate that the  
282 bottleneck that reduced mtDNA diversity in some populations might also have reduced  
283 nuclear diversity. However, microsatellite diversity would have increased since then due to its  
284 higher mutation rate (Estoup *et al.* 1996). Microsatellite diversity was not significantly  
285 different among all populations but Porto União. This result suggests that ecological features  
286 of each sampling site are not influencing the molecular diversity. Indeed, two environmental  
287 variables such as size of the sampled area and median elevation were not significantly  
288 correlated to the genetic diversity observed for both mtDNA and microsatellite markers.

289 High and significant inbreeding ( $F_{IS}$ ) was found only in two populations (Foz do  
290 Iguaçu and São José). Nonetheless, these data should not be under deep concern since these  
291 two populations present high microsatellite diversity and are not genetically isolated.  
292 Moreover, our results did not detect recent bottleneck (e.g. due to habitat fragmentation) in  
293 any of the studied populations.

294 Microsatellite data also indicated high genetic structure and low gene flow among  
295 populations, suggesting that males also do not disperse over long distances even between  
296 populations separated by 34 km of continuous Atlantic Forest. It is interesting here to  
297 emphasize that all island populations were differentiated from their mainland counterparts,  
298 indicating that males cannot cross even 300 m or greater distances over water. The program

299 BAYESASS suggested that the highest migration rate was from Prudentópolis to Teodoro  
300 Sampaio, populations separated by more than 300 km. These two populations do not share  
301 any mtDNA haplotypes suggesting that this gene flow is mediated only by males across  
302 generations.

303 For both markers population clusters appear to be unrelated to physical barriers (such  
304 as rivers or mountain ranges) or forest presence, indicating that genetic connectivity demands  
305 more than only habitat connectivity (Marsden *et al.* 2012). Populations may diverge even with  
306 no obstacles to gene flow due to low dispersal, geographic distance and genetic drift (isolation  
307 by distance). In a general view, population structure of *T. angustula* is shaped by isolation by  
308 distance.

309 The highest divergence found for both markers was between Porto União/Foz do  
310 Iguaçu and the remaining populations. At least 15 mtDNA mutation steps separate these two  
311 populations from the others. This represents about 2.8 to 3.3% divergence, which is as high as  
312 the divergence between lineages A and Y of *Apis mellifera* (Franck *et al.* 2001). Francisco *et*  
313 *al.* (2014) suggested that bees from Porto União and Foz do Iguaçu might belong to the  
314 subspecies *T. angustula fiebrigi* while the others to *T. angustula angustula*.

315 Among the islands we visited only Ilha do Mel (Zanella 2005), Ilha de Santa Catarina  
316 (Steiner *et al.* 2006) and Ilha Grande (Lorenzon *et al.* 2006) had been previously surveyed for  
317 bees and *T. angustula* was reported on all of them. We did not locate *T. angustula* on six of  
318 the 11 islands visited. The failure in collecting *T. angustula* in most islands may be due its  
319 ancestral absence in the islands when they were isolated or due to its extinction after isolation.  
320 The constraint on queen dispersal prevents (re)colonization of islands whose distance from  
321 the mainland is greater than a few hundred of meters. Even if (re)colonization has occurred,  
322 its settlement may not have been successful. With low dispersal, *T. angustula* has low  
323 effective population size and high extinction rate. Island size may be critical to the survival of

324 viable *T. angustula* populations – we were unable to locate them on any island less than 28  
325 km<sup>2</sup>. Competition among colonies doubtless limits the number of colonies an island can  
326 support so that small islands may not be able to maintain viable populations of *T. angustula*.  
327 The rarity of stingless bee species on islands has been noted elsewhere (Schwartz-Filho &  
328 Laroca 1999; Zanella 2005).

329 Our results indicate that *T. angustula* is not genetically homogeneous across the  
330 studied area. Considering that this species has a continental distribution, we speculate this  
331 species is very old and probably constituted by a wide range of genetically different taxa with  
332 the same (or similar) morphology. Sampling across its entire distribution range is needed to  
333 elucidate its taxonomic status as well as its evolutionary history.

334

335

### 336 **Acknowledgments**

337 We are grateful to Paulo Henrique P. Gonçalves for his help with the sampling and to Susy  
338 Coelho and Julie Lim for technical assistance. We thank Adílson de Godoy, Carlos Chociai,  
339 Flávio Haupenthal, Geraldo Moretto, Marcos Wasilewski, Marcos Antonio, Renato Marques,  
340 José Moisés, André Trindade, Teófilo, Eduardo da Silva, Guaraci Cordeiro, Marcos Fujimoto,  
341 PC Fernandes, Samuel Boff, Thaiomara Alves, the managers and the staff of the Parks, the  
342 residents of Ilha da Vitória, Ilha de Búzios and Ilha Monte de Trigo, and countless people  
343 who assisted us in the fieldwork. We thank Dr. Jeffrey Lozier for comments on an early  
344 version of this manuscript. For permits, we thank Instituto Brasileiro do Meio Ambiente e dos  
345 Recursos Naturais Renováveis (IBAMA) and Instituto Chico Mendes de Conservação da  
346 Biodiversidade (ICMBio) (18457-1), Instituto Florestal do estado de São Paulo (260108 -  
347 000.000.002.517/0 2008), Instituto Ambiental do estado do Paraná (128/09) and Instituto  
348 Estadual do Ambiente do Rio de Janeiro (E-07/300.011/0). This work was supported by

349 Fundação de Amparo à Pesquisa do Estado de São Paulo (04/15801-0; 08/07417-6; 08/08546-  
350 4; 10/18716-4; 10/50597-5) and Australian Research Council. This work was developed in the  
351 Research Center on Biodiversity and Computing (BioComp) of the Universidade de São  
352 Paulo (USP), supported by the USP Provost's Office for Research.  
353



354 **References**

- 355 Avise JC (2000) *Phylogeography: The History and Formation of Species*. Harvard University  
356 Press, Cambridge, MA.
- 357 Baitala TV, Mangolin CA, Toledo VAA, Ruvolo-Takasusuki MCC (2006) RAPD  
358 polymorphism in *Tetragonisca angustula* (Hymenoptera; Meliponinae, Trigonini)  
359 populations. *Sociobiology*, **48**, 1–13.
- 360 Batalha-Filho H, Waldschmidt AM, Campos LAO, Tavares MG, Fernandes-Salomão TM  
361 (2010) Phylogeography and historical demography of the neotropical stingless bee  
362 *Melipona quadrifasciata* (Hymenoptera, Apidae): incongruence between morphology  
363 and mitochondrial DNA. *Apidologie*, **41**, 534–547.
- 364 Batista MA, Ramalho M, Soares AEE (2003) Nesting sites and abundance of Meliponini  
365 (Hymenoptera: Apidae) in heterogeneous habitats of the Atlantic Rain Forest. *Lundiana*,  
366 **4**, 19–23.
- 367 Bell RC, Brasileiro CA, Haddad CFB, Zamudio KR (2012) Evolutionary history of *Scinax*  
368 treefrogs on land-bridge islands in south-eastern Brazil. *Journal of Biogeography*, **39**,  
369 1733–1742.
- 370 Brito RM, Arias MC (2010) Genetic structure of *Partamona helleri* (Apidae, Meliponini)  
371 from Neotropical Atlantic rainforest. *Insectes Sociaux*, **57**, 413–419.
- 372 Brito RM, Francisco FO, Domingues-Yamada AMT *et al.* (2009) Characterization of  
373 microsatellite loci of *Tetragonisca angustula* (Hymenoptera, Apidae, Meliponini).  
374 *Conservation Genetics Resources*, **1**, 183–187.
- 375 Brito RM, Francisco FO, Françoso E, Santiago LR, Arias MC (2013) Very low mitochondrial  
376 variability in a stingless bee endemic to cerrado. *Genetics and Molecular Biology*, **36**,  
377 124–128.
- 378 Cabanne GS, Santos FR, Miyaki CY (2007) Phylogeography of *Xiphorhynchus fuscus*  
379 (Passeriformes, Dendrocolaptidae): vicariance and recent demographic expansion in  
380 southern Atlantic forest. *Biological Journal of the Linnean Society*, **91**, 73–84.
- 381 Camargo JMF, Pedro SM (2013) Meliponini Lepeletier, 1836. In: *Catalogue of Bees*  
382 (*Hymenoptera, Apoidea*) in the Neotropical Region - online version (eds Moure JS,  
383 Urban D, Melo GAR)
- 384 Cameron EC, Franck P, Oldroyd BP (2004) Genetic structure of nest aggregations and drone  
385 congregations of the southeast Asian stingless bee *Trigona collina*. *Molecular Ecology*,  
386 **13**, 2357–2364.
- 387 Carnaval AC, Hickerson MJ, Haddad CFB, Rodrigues MT, Moritz C (2009) Stability predicts  
388 genetic diversity in the Brazilian Atlantic Forest hotspot. *Science*, **323**, 785–789.
- 389 Carvajal-Rodríguez A, Uña-Alvarez J, Rolán-Alvarez E (2009) A new multitest correction  
390 (SGoF) that increases its statistical power when increasing the number of tests. *BMC*

- 391 *Bioinformatics*, **10**, 209.
- 392 Cheng L, Connor TR, Sirén J, Aanensen DM, Corander J (2013) Hierarchical and spatially  
393 explicit clustering of DNA sequences with BAPS software. *Molecular Biology and*  
394 *Evolution*, **30**, 1224–1228.
- 395 Corander J, Sirén J, Arjas E (2008) Bayesian spatial modeling of genetic population structure.  
396 *Computational Statistics*, **23**, 111–129.
- 397 Cortopassi-Laurino M (2007) Drone congregations in Meliponini: what do they tell us?  
398 *Bioscience Journal*, **23**, 153–160.
- 399 Cortopassi-Laurino M, Imperatriz-Fonseca VL, Roubik DW *et al.* (2006) Global  
400 Meliponiculture: challenges and opportunities. *Apidologie*, **37**, 1–18.
- 401 D’Horta FM, Cabanne GS, Meyer D, Miyaki CY (2011) The genetic effects of Late  
402 Quaternary climatic changes over a tropical latitudinal gradient: diversification of an  
403 Atlantic Forest passerine. *Molecular Ecology*, **20**, 1923–1935.
- 404 Estoup A, Solignac M, Cornuet J-M, Goudet J, Scholl A (1996) Genetic differentiation of  
405 continental and island populations of *Bombus terrestris* (Hymenoptera: Apidae) in  
406 Europe. *Molecular Ecology*, **5**, 19–31.
- 407 Excoffier L, Lischer HE (2010) Arlequin suite ver 3.5: a new series of programs to perform  
408 population genetics analyses under Linux and Windows. *Molecular Ecology Resources*,  
409 **10**, 564–567.
- 410 Francisco FO, Arias MC (2010) Inferences of evolutionary and ecological events that  
411 influenced the population structure of *Plebeia remota*, a stingless bee from Brazil.  
412 *Apidologie*, **41**, 216–224.
- 413 Francisco FO, Brito RM, Santiago LR *et al.* (2011) Isolation and characterization of 15  
414 microsatellite loci in the stingless bee *Plebeia remota* (Apidae: Meliponini).  
415 *Conservation Genetics Resources*, **3**, 417–419.
- 416 Francisco FO, Santiago LR, Arias MC (2013) Molecular genetic diversity in populations of  
417 the stingless bee *Plebeia remota*: A case study. *Genetics and Molecular Biology*, **36**,  
418 118–123.
- 419 Francisco FO, Santiago LR, Brito RM, Oldroyd BP, Arias MC (2014) Hybridization and  
420 asymmetric introgression between *Tetragonisca angustula* and *Tetragonisca fiebrigi*.  
421 *Apidologie*, **45**, 1–9.
- 422 Franck P, Garnery L, Loiseau A *et al.* (2001) Genetic diversity of the honeybee in Africa:  
423 microsatellite and mitochondrial data. *Heredity*, **86**, 420–430.
- 424 Hedrick PW (2005) A standardized genetic differentiation measure. *Evolution*, **59**, 1633–  
425 1638.
- 426 Heller R, Siegismund HR (2009) Relationship between three measures of genetic

- 427 differentiation  $G_{ST}$ ,  $DEST$  and  $G'ST$ : how wrong have we been? *Molecular Ecology*,  
428 **18**, 2080–2083.
- 429 Jones OR, Wang J (2010) colony: a program for parentage and sibship inference from  
430 multilocus genotype data. *Molecular Ecology Resources*, **10**, 551–555.
- 431 Jost L (2008)  $G_{ST}$  and its relatives do not measure differentiation. *Molecular Ecology*, **17**,  
432 4015–4026.
- 433 Kalinowski ST (2005) hp-rare 1.0: a computer program for performing rarefaction on  
434 measures of allelic richness. *Molecular Ecology Notes*, **5**, 187–189.
- 435 Kimura M (1980) A simple method for estimating evolutionary rates of base substitutions  
436 through comparative studies of nucleotide sequences. *Journal of Molecular Evolution*,  
437 **16**, 111–120.
- 438 Kraus FB, Weinhold S, Moritz RFA (2008) Genetic structure of drone congregations of the  
439 stingless bee *Scaptotrigona mexicana*. *Insectes Sociaux*, **55**, 22–27.
- 440 Lindauer M, Kerr WE (1960) Communication between the workers of stingless bees. *Bee*  
441 *World*, **41**, 29–41, 65–71.
- 442 Lorenzon MCA, Conde MMS, Barbosa CG (2006) Eusocial Apidae in tropical insular region.  
443 *Brazilian Archives of Biology and Technology*, **49**, 733–738.
- 444 Luikart G, Allendorf FW, Cornuet J-M, Sherwin WB (1998) Distortion of allele frequency  
445 distributions provides a test for recent population bottlenecks. *Journal of Heredity*, **89**,  
446 238–247.
- 447 Mann HB, Whitney DR (1947) On a test of whether one of two random variables is  
448 stochastically larger than the other. *The Annals of Mathematical Statistics*, **18**, 50–60.
- 449 Marsden CD, Woodroffe R, Mills MGL *et al.* (2012) Spatial and temporal patterns of neutral  
450 and adaptive genetic variation in the endangered African wild dog (*Lycaon pictus*).  
451 *Molecular Ecology*, **21**, 1379–1393.
- 452 Michener CD (2007) *The Bees of the World*. Johns Hopkins University Press, Baltimore, MD.
- 453 Mueller MY, Moritz RFA, Kraus FB (2012) Outbreeding and lack of temporal genetic  
454 structure in a drone congregation of the neotropical stingless bee *Scaptotrigona*  
455 *mexicana*. *Ecology and Evolution*, **2**, 1304–1311.
- 456 Nogueira-Neto P (1997) *Vida e Criação de Abelhas Indígenas Sem Ferrão*. Nogueirapis, São  
457 Paulo, SP.
- 458 Oliveira RC, Nunes FMF, Campos APS *et al.* (2004) Genetic divergence in *Tetragonisca*  
459 *angustula* Latreille, 1811 (Hymenoptera, Meliponinae, Trigonini) based on RAPD  
460 markers. *Genetics and Molecular Biology*, **27**, 181–186.
- 461 van Oosterhout C, Hutchinson WF, Wills DPM, Shipley P (2004) micro-checker: software for  
462 identifying and correcting genotyping errors in microsatellite data. *Molecular Ecology*

- 463        *Notes*, **4**, 535–538.
- 464    Palmer KA, Oldroyd BP, Quezada-Euán JGG, Paxton RJ, May-Itzá WJ (2002) Paternity  
465        frequency and maternity of males in some stingless bee species. *Molecular Ecology*, **11**,  
466        2107–2113.
- 467    Paxton RJ (2000) Genetic structure of colonies and a male aggregation in the stingless bee  
468        *Scaptotrigona postica*, as revealed by microsatellite analysis. *Insectes Sociaux*, **47**, 63–  
469        69.
- 470    Peakall R, Smouse PE (2006) genalex 6: genetic analysis in Excel. Population genetic  
471        software for teaching and research. *Molecular Ecology Notes*, **6**, 288–295.
- 472    Peakall R, Smouse PE (2012) GenA1Ex 6.5: Genetic analysis in Excel. Population genetic  
473        software for teaching and research – an update. *Bioinformatics*, **28**, 2537–2539.
- 474    Peters JM, Queller DC, Imperatriz-Fonseca VL, Roubik DW, Strassmann JE (1999) Mate  
475        number, kin selection and social conflicts in stingless bees and honeybees. *Proceedings*  
476        *of the Royal Society B*, **266**, 379–384.
- 477    Piry S, Luikart G, Cornuet J-M (1999) BOTTLENECK: a computer program for detecting  
478        recent reductions in the effective size using allele frequency data. *Journal of Heredity*,  
479        **90**, 502–503.
- 480    Quezada-Euán JGG, May-Itzá WJ, Rincón M, De la Rúa P, Paxton RJ (2012) Genetic and  
481        phenotypic differentiation in endemic *Scaptotrigona hellwegeri* (Apidae: Meliponini):  
482        implications for the conservation of stingless bee populations in contrasting  
483        environments. *Insect Conservation and Diversity*, **5**, 433–443.
- 484    Di Rienzo A, Peterson AC, Garza JC *et al.* (1994) Mutational processes of simple-sequence  
485        repeat loci in human populations. *Proceedings of the National Academy of Sciences of*  
486        *the United States of America*, **91**, 3166–3170.
- 487    Rousset F (2008) genepop'007: a complete re-implementation of the genepop software for  
488        Windows and Linux. *Molecular Ecology Resources*, **8**, 103–106.
- 489    Schwartz-Filho D, Laroca S (1999) A comunidade de abelhas silvestres (Hymenoptera,  
490        Apoidea) da Ilha das Cobras (Paraná, Brasil) aspectos ecológicos e biogeográficos. *Acta*  
491        *Biológica Paranaense*, **28**, 19–108.
- 492    Silveira FA, Melo GAR, Almeida EAB (2002) *Abelhas Brasileiras: Sistemática e*  
493        *Identificação*. Fundação Araucária, Belo Horizonte, MG.
- 494    Slaa EJ (2006) Population dynamics of a stingless bee community in the seasonal dry  
495        lowlands of Costa Rica. *Insectes Sociaux*, **53**, 70–79.
- 496    Steiner J, Harter-Marques B, Zillikens A, Feja EP (2006) Bees of Santa Catarina Island,  
497        Brazil - a first survey and checklist (Insecta: Apoidea). *Zootaxa*, **1220**, 1–18.
- 498    Stuchi ALPB, Ruvolo-Takasusuki MCC, Toledo VAA (2008) Análise da genética de

- 499 populações em abelhas jataí (*Tetragonisca angustula* Latreille) por meio de isoenzimas.  
500 *Magistra*, **20**, 68–77.
- 501 Suguio K, Angulo RJ, Carvalho AM *et al.* (2005) Paleoníveis do mar e paleolinhas de costa.  
502 In: *Quaternário do Brasil* (eds Souza CRG, Suguio K, Oliveira AMS, Oliveira PE), pp.  
503 114–129. Associação Brasileira de Estudos do Quaternário, São Paulo.
- 504 Suguio K, Tatumi SH, Kowata EA, Munita CS, Paiva RP (2003) Upper Pleistocene deposits  
505 of the Comprida Island (São Paulo State) dated by thermoluminescence method. *Anais*  
506 *da Academia Brasileira de Ciências*, **75**, 91–96.
- 507 Tamura K, Peterson D, Peterson N *et al.* (2011) MEGA5: Molecular Evolutionary Genetics  
508 Analysis using maximum likelihood, evolutionary distance, and maximum parsimony  
509 methods. *Molecular Biology and Evolution*, **28**, 2731–2739.
- 510 van Veen JW, Sommeijer MJ (2000a) Colony reproduction in *Tetragonisca angustula*  
511 (Apidae, Meliponini). *Insectes Sociaux*, **47**, 70–75.
- 512 van Veen JW, Sommeijer MJ (2000b) Observations on gynes and drones around nuptial  
513 flights in the stingless bees *Tetragonisca angustula* and *Melipona beecheii*  
514 (Hymenoptera, Apidae, Meliponinae). *Apidologie*, **31**, 47–54.
- 515 Velez-Ruiz RI, Gonzalez VH, Engel MS (2013) Observations on the urban ecology of the  
516 Neotropical stingless bee *Tetragonisca angustula* (Hymenoptera: Apidae: Meliponini).  
517 *Journal of Melittology*, **15**, 1–8.
- 518 Velthuis HHW, Koedam D, Imperatriz-Fonseca VL (2005) The males of *Melipona* and other  
519 stingless bees, and their mothers. *Apidologie*, **36**, 169–185.
- 520 Weir BS, Cockerham CC (1984) Estimating *F*-statistics for the analysis of population  
521 structure. *Evolution*, **38**, 1358–1370.
- 522 Wilson GA, Rannala B (2003) Bayesian inference of recent migration rates using multilocus  
523 genotypes. *Genetics*, **163**, 1177–1191.
- 524 Zanella FCV (2005) Abelhas da Ilha do Mel: estrutura da comunidade, relações  
525 biogeográficas e variação sazonal. In: *História Natural e Conservação da Ilha do Mel*  
526 (eds Marques MCM, Britez RM), pp. 189–208. Editora da UFPR, Curitiba.
- 527

528 **Table 1.** Population characteristics and genetic diversity in *Tetragonisca angustula* populations. SA: sampled area in square kilometers. ME:  
529 median elevation in meters. N: sample size. NH: number of haplotypes.  $h \pm sd$ : haplotype diversity and standard deviation.  $\pi \pm sd$ : nucleotide  
530 diversity and standard deviation.  $Ar \pm se$ : allelic richness after rarefaction for 22 individuals and standard error.  $H_E \pm se$ : expected heterozygosity  
531 and standard error.  $F_{IS}$ : inbreeding coefficient.

| Population                      | SA<br>(km <sup>2</sup> ) | ME<br>(m) | N  | NH | $h \pm sd$    | $\pi \pm sd$    | $Ar \pm se$ | $H_E \pm se$  | $F_{IS}$ |
|---------------------------------|--------------------------|-----------|----|----|---------------|-----------------|-------------|---------------|----------|
| 1. Teresópolis (TERE)           | 253                      | 939       | 46 | 5  | 0.207 ± 0.079 | 0.0087 ± 0.0080 | 9.07 ± 1.27 | 0.770 ± 0.045 | 0.0251   |
| 2. Resende (RESE)               | 10                       | 444       | 44 | 3  | 0.394 ± 0.072 | 0.0065 ± 0.0066 | 9.45 ± 1.40 | 0.773 ± 0.054 | 0.0248   |
| 3. Passa Quatro (PASQ)          | 385                      | 911       | 48 | 2  | 0.042 ± 0.039 | 0.0006 ± 0.0019 | 6.02 ± 0.97 | 0.626 ± 0.082 | -0.0185  |
| 4. Angra dos Reis (ANGR)        | 1208                     | 12        | 57 | 7  | 0.642 ± 0.049 | 0.0369 ± 0.0225 | 8.97 ± 1.47 | 0.769 ± 0.041 | 0.0463*  |
| 5. Ilha Grande (IGRA)           | 193 <sup>&amp;</sup>     | 11        | 57 | 5  | 0.687 ± 0.032 | 0.0153 ± 0.0116 | 6.50 ± 1.26 | 0.682 ± 0.057 | 0.0247   |
| 6. São Sebastião (SSEB)         | 117                      | 14        | 46 | 3  | 0.478 ± 0.052 | 0.0075 ± 0.0072 | 8.05 ± 1.32 | 0.712 ± 0.050 | 0.0088   |
| 7. Ilha de São Sebastião (IBEL) | 336 <sup>&amp;</sup>     | 25        | 49 | 3  | 0.190 ± 0.072 | 0.0036 ± 0.0047 | 6.11 ± 0.98 | 0.636 ± 0.061 | 0.0062   |
| 8. Iguape (GUAP)                | 67                       | 13        | 38 | 3  | 0.152 ± 0.077 | 0.0070 ± 0.0070 | 6.75 ± 1.13 | 0.637 ± 0.080 | -0.0353  |
| 9. Ilha Comprida (ICOM)         | 200 <sup>&amp;</sup>     | 10        | 22 | 4  | 0.398 ± 0.122 | 0.0407 ± 0.0251 | 5.64 ± 0.69 | 0.659 ± 0.054 | 0.0381   |
| 10. Apiaí (APIA)                | 504                      | 161       | 45 | 6  | 0.625 ± 0.068 | 0.0152 ± 0.0115 | 7.35 ± 1.40 | 0.634 ± 0.086 | 0.0142   |
| 11. Guaratuba (GUAR)            | 341                      | 15        | 36 | 6  | 0.636 ± 0.061 | 0.0233 ± 0.0159 | 7.02 ± 1.28 | 0.611 ± 0.084 | 0.038    |
| 12. Blumenau (BLUM)             | 389                      | 36        | 45 | 8  | 0.628 ± 0.062 | 0.0127 ± 0.0102 | 7.38 ± 1.48 | 0.594 ± 0.102 | 0.0857** |
| 13. São José (SJOS)             | 841                      | 11        | 24 | 5  | 0.493 ± 0.116 | 0.0084 ± 0.0080 | 7.29 ± 1.48 | 0.604 ± 0.092 | 0.2177** |
| 14. Prudentópolis (PRUD)        | 885                      | 811       | 42 | 5  | 0.302 ± 0.089 | 0.0049 ± 0.0056 | 6.35 ± 0.97 | 0.621 ± 0.070 | 0.0404   |
| 15. Porto União (PUNI)          | 1521                     | 913       | 35 | 5  | 0.506 ± 0.090 | 0.0086 ± 0.0080 | 5.37 ± 0.94 | 0.513 ± 0.072 | 0.0832** |
| 16. Foz do Iguaçu (FOZI)        | 5148                     | 543       | 43 | 9  | 0.632 ± 0.074 | 0.0157 ± 0.0119 | 6.59 ± 1.15 | 0.555 ± 0.064 | 0.1389** |
| 17. Teodoro Sampaio (TSAM)      | 5550                     | 440       | 45 | 9  | 0.716 ± 0.058 | 0.0179 ± 0.0130 | 7.22 ± 1.13 | 0.616 ± 0.081 | 0.0965** |

532 <sup>&</sup>: island area; \*:  $P < 0.05$ ; \*\*:  $P < 0.01$ .

533 **Table 2.** Estimates of evolutionary divergence over sequence pairs between populations of *Tetragonisca angustula*. The number of base  
534 substitutions per site from averaging over all sequence pairs between populations are shown. Analyses were conducted using the Kimura 2-  
535 parameter model (Kimura, 1980) and involved 722 nucleotide sequences. Population abbreviations as in Table 1.

|      | TERE   | RESE   | PASQ   | ANGR   | IGRA   | SSEB   | IBEL   | GUAP   | ICOM   | APIA   | GUAR   | BLUM   | SJOS   | PRUD   | PUNI   | FOZI   |
|------|--------|--------|--------|--------|--------|--------|--------|--------|--------|--------|--------|--------|--------|--------|--------|--------|
| RESE | 0.0071 |        |        |        |        |        |        |        |        |        |        |        |        |        |        |        |
| PASQ | 0.0085 | 0.0109 |        |        |        |        |        |        |        |        |        |        |        |        |        |        |
| ANGR | 0.0077 | 0.0101 | 0.0067 |        |        |        |        |        |        |        |        |        |        |        |        |        |
| IGRA | 0.0079 | 0.0103 | 0.0069 | 0.0042 |        |        |        |        |        |        |        |        |        |        |        |        |
| SSEB | 0.0094 | 0.0118 | 0.0083 | 0.0064 | 0.0076 |        |        |        |        |        |        |        |        |        |        |        |
| IBEL | 0.0084 | 0.0108 | 0.0074 | 0.0056 | 0.0066 | 0.0010 |        |        |        |        |        |        |        |        |        |        |
| GUAP | 0.0088 | 0.0111 | 0.0077 | 0.0058 | 0.0070 | 0.0012 | 0.0004 |        |        |        |        |        |        |        |        |        |
| ICOM | 0.0082 | 0.0111 | 0.0067 | 0.0062 | 0.0072 | 0.0028 | 0.0020 | 0.0000 |        |        |        |        |        |        |        |        |
| APIA | 0.0084 | 0.0107 | 0.0078 | 0.0057 | 0.0073 | 0.0016 | 0.0008 | 0.0022 | 0.0025 |        |        |        |        |        |        |        |
| GUAR | 0.0089 | 0.0113 | 0.0073 | 0.0061 | 0.0072 | 0.0020 | 0.0012 | 0.0014 | 0.0028 | 0.0017 |        |        |        |        |        |        |
| BLUM | 0.0083 | 0.0111 | 0.0078 | 0.0060 | 0.0071 | 0.0015 | 0.0007 | 0.0009 | 0.0024 | 0.0013 | 0.0017 |        |        |        |        |        |
| SJOS | 0.0089 | 0.0113 | 0.0079 | 0.0059 | 0.0071 | 0.0012 | 0.0005 | 0.0007 | 0.0023 | 0.0011 | 0.0015 | 0.0010 |        |        |        |        |
| PRUD | 0.0099 | 0.0123 | 0.0015 | 0.0081 | 0.0083 | 0.0097 | 0.0088 | 0.0090 | 0.0081 | 0.0092 | 0.0087 | 0.0092 | 0.0092 |        |        |        |
| PUNI | 0.0319 | 0.0317 | 0.0295 | 0.0315 | 0.0339 | 0.0329 | 0.0319 | 0.0319 | 0.0321 | 0.0317 | 0.0314 | 0.0323 | 0.0323 | 0.0308 |        |        |
| FOZI | 0.0311 | 0.0309 | 0.0287 | 0.0308 | 0.0331 | 0.0321 | 0.0312 | 0.0312 | 0.0313 | 0.0310 | 0.0306 | 0.0315 | 0.0315 | 0.0301 | 0.0012 |        |
| TSAM | 0.0088 | 0.0111 | 0.0009 | 0.0070 | 0.0072 | 0.0085 | 0.0076 | 0.0079 | 0.0071 | 0.0081 | 0.0076 | 0.0081 | 0.0081 | 0.0023 | 0.0297 | 0.0289 |

537

**Table 3.** Pairwise index of differentiation ( $D_{\text{est}}$ ) from microsatellite data of *Tetragonisca angustula*. Population abbreviations as in Table 1.

|      | TERE   | RESE   | PASQ   | ANGR   | IGRA   | SSEB   | IBEL   | GUAP   | ICOM   | APIA   | GUAR   | BLUM   | SJOS   | PRUD   | PUNI   | FOZI   |
|------|--------|--------|--------|--------|--------|--------|--------|--------|--------|--------|--------|--------|--------|--------|--------|--------|
| RESE | 0.1074 |        |        |        |        |        |        |        |        |        |        |        |        |        |        |        |
| PASQ | 0.2821 | 0.2177 |        |        |        |        |        |        |        |        |        |        |        |        |        |        |
| ANGR | 0.1761 | 0.0988 | 0.2842 |        |        |        |        |        |        |        |        |        |        |        |        |        |
| IGRA | 0.3183 | 0.2389 | 0.4053 | 0.1735 |        |        |        |        |        |        |        |        |        |        |        |        |
| SSEB | 0.2866 | 0.2082 | 0.4191 | 0.1710 | 0.1186 |        |        |        |        |        |        |        |        |        |        |        |
| IBEL | 0.4341 | 0.3806 | 0.4261 | 0.3119 | 0.2912 | 0.2144 |        |        |        |        |        |        |        |        |        |        |
| GUAP | 0.3914 | 0.3053 | 0.4394 | 0.2455 | 0.1733 | 0.0975 | 0.2064 |        |        |        |        |        |        |        |        |        |
| ICOM | 0.3129 | 0.2739 | 0.3395 | 0.2152 | 0.1883 | 0.1594 | 0.2254 | 0.0992 |        |        |        |        |        |        |        |        |
| APIA | 0.3826 | 0.3016 | 0.4209 | 0.2389 | 0.1904 | 0.1042 | 0.1802 | 0.0300 | 0.1356 |        |        |        |        |        |        |        |
| GUAR | 0.3787 | 0.3153 | 0.4012 | 0.2914 | 0.2115 | 0.1251 | 0.2069 | 0.0912 | 0.1568 | 0.0445 |        |        |        |        |        |        |
| BLUM | 0.3866 | 0.3101 | 0.4063 | 0.2943 | 0.1854 | 0.1298 | 0.2300 | 0.0551 | 0.1550 | 0.0328 | 0.0204 |        |        |        |        |        |
| SJOS | 0.3928 | 0.3339 | 0.4518 | 0.3108 | 0.2159 | 0.1234 | 0.1959 | 0.0834 | 0.2113 | 0.0468 | 0.0375 | 0.0212 |        |        |        |        |
| PRUD | 0.2772 | 0.2424 | 0.1387 | 0.3213 | 0.4331 | 0.4518 | 0.5061 | 0.4647 | 0.3608 | 0.4803 | 0.4253 | 0.4341 | 0.4854 |        |        |        |
| PUNI | 0.7951 | 0.7547 | 0.8380 | 0.6959 | 0.7074 | 0.6485 | 0.6971 | 0.6693 | 0.7351 | 0.6764 | 0.7051 | 0.6824 | 0.6344 | 0.8281 |        |        |
| FOZI | 0.7863 | 0.7375 | 0.8439 | 0.6896 | 0.6589 | 0.5886 | 0.6663 | 0.6296 | 0.7007 | 0.6154 | 0.6276 | 0.6061 | 0.5685 | 0.8464 | 0.0274 |        |
| TSAM | 0.2649 | 0.2257 | 0.1173 | 0.3242 | 0.3981 | 0.4218 | 0.4545 | 0.4396 | 0.3552 | 0.4504 | 0.4043 | 0.4052 | 0.4466 | 0.0308 | 0.8015 | 0.8169 |

538

Colours highlight  $D_{\text{est}}$  values. Green:  $D_{\text{est}} < 0.05$ ; yellow:  $0.05 < D_{\text{est}} < 0.15$ ; orange:  $0.15 < D_{\text{est}} < 0.25$ ; red:  $D_{\text{est}} > 0.25$ . All  $P < 0.0054$ .

539



540 **Figure legend**

541

542 **Fig. 1.** Posterior probability assignment (vertical axis) of individual genotypes (horizontal  
543 axis) for  $K = 10$  (*Tetragonisca angustula*) according to the program BAPS (upper panel).

544 Below, map of the studied area with the approximate location of the sampled populations.

545 Population names are 1: Teresópolis, 2: Resende, 3: Passa Quatro, 4: Angra dos Reis, 5: Ilha

546 Grande, 6: São Sebastião, 7: Ilha de São Sebastião, 8: Iguape, 9: Ilha Comprida, 10: Apiaí, 11:

547 Guaratuba, 12: Blumenau, 13: São José, 14: Prudentópolis, 15: Porto União, 16: Foz do

548 Iguaçú, and 17: Teodoro Sampaio. Detailed location of all islands visited (lower panels).

549 IGRA: Ilha Grande; IANC: Ilha Anchieta; ITMD: Ilha do Tamanduá; IVIT: Ilha da Vitória;

550 IBUZ: Ilha de Búzios; IBEL: Ilha de São Sebastião; IMTG: Ilha Monte de Trigo. ICOM: Ilha

551 Comprida; ICAR: Ilha do Cardoso; IMEL: Ilha do Mel. ISCA: Ilha de Santa Catarina.

52

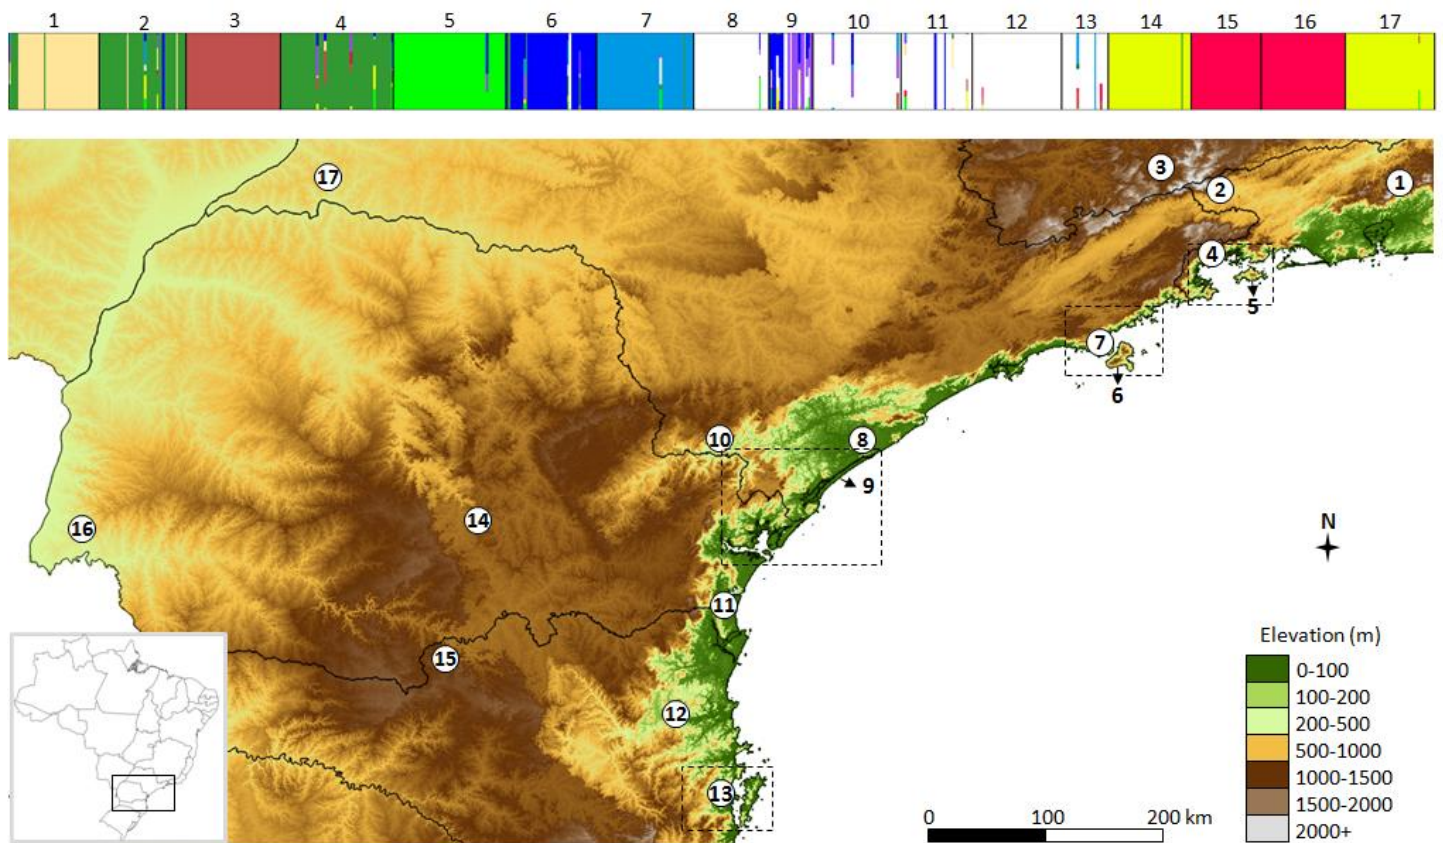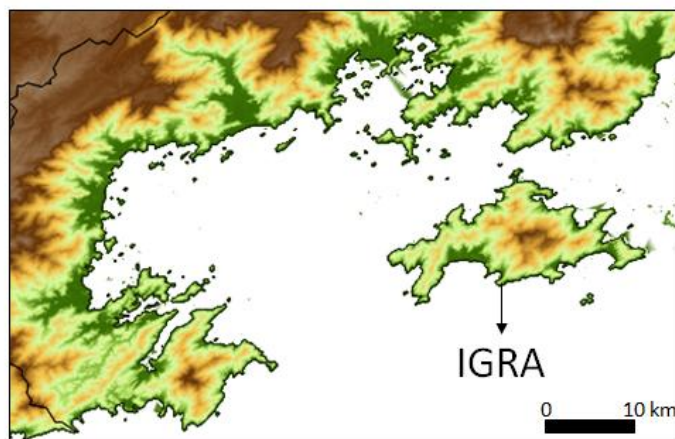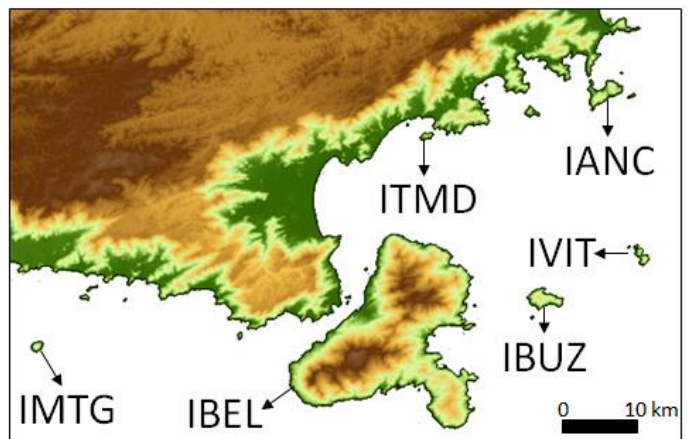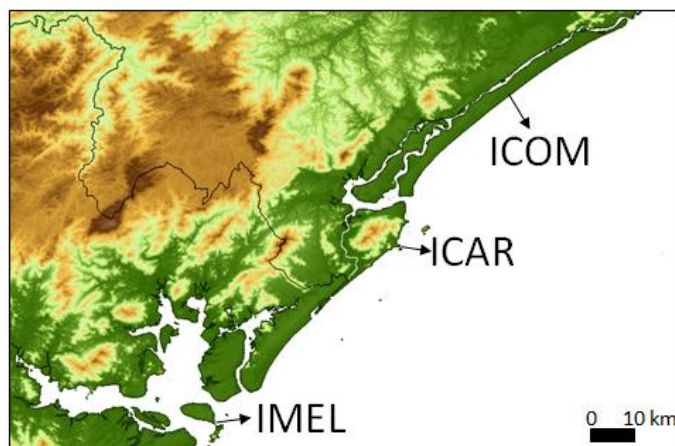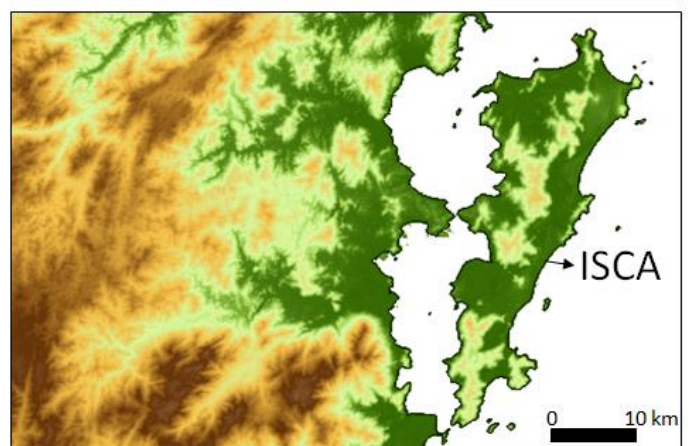

53
